# Comparative evaluation of methodologies for estimating the effectiveness of non-pharmaceutical interventions in the context of COVID-19: a simulation study

Iris Ganser, MSc <sup>1,2</sup>, Juliette Paireau, PhD<sup>3</sup>, David L Buckeridge, PhD <sup>2</sup>, Simon Cauchemez, PhD<sup>3</sup>, Rodolphe Thiebaut, PhD <sup>1,4,5,6</sup>, and Mélanie Prague, PhD <sup>1,4,5</sup>

<sup>1</sup>Univ. Bordeaux, Inserm, BPH Research Center, SISTM Team, UMR 1219, Bordeaux, France

<sup>2</sup>McGill Health Informatics, School of Population and Global Health, McGill University, Montreal, Quebec, Canada

<sup>3</sup>Institut Pasteur, Mathematical Modelling of Infectious Diseases Unit, Paris, France

<sup>4</sup>Inria Bordeaux - Sud-Ouest, SISTM Team, Talence, France

<sup>5</sup>Vaccine Research Institute, Creteil, France

<sup>6</sup>Bordeaux University Hospital, Medical Information Department, Bordeaux, France

## Abstract

Numerous studies assessing the effectiveness of non-pharmaceutical interventions (NPIs) against COVID-19 have produced conflicting results, partly due to methodological differences. This study aims to clarify these discrepancies by comparing two frequently used approaches in terms of parameter bias and confidence interval coverage of NPI effectiveness parameters. We compared two-step approaches, where NPI effects are regressed on by-products of a first analysis, such as the effective reproduction number  $\mathcal{R}_t$ , with more integrated models that jointly estimate NPI effects and transmission rates in a single-step approach. We simulated datasets with mechanistic and an agent-based models and analyzed them with both mechanistic models and a two-step regression procedure. In the latter,  $\mathcal{R}_t$  was estimated first and then used as the outcome in a linear regression with NPI variables as predictors. Mechanistic models consistently outperformed two-step regressions, exhibiting minimal bias (0-5%) and accurate confidence interval coverage. Conversely, the two-step regression showed up to 25% bias, with significantly lower-than-nominal confidence interval coverage, reflecting challenges in uncertainty propagation. We identified additional challenges in the two-step regression method, such high depletion of susceptibles and time lags in observational data. Our findings suggest caution when using two-step

NOTE: This preprint reports new research that has not been certified by peer review and should not be used to guide clinical practice.

29 regression methods for estimating NPI effectiveness.

30

31 **Keywords:** dynamical models, non-pharmaceutical interventions, simulations, reproductive

32 number, non-linear mixed effects models

## 33 1 Introduction

34 The emergence of novel infectious agents, such as the SARS-CoV-2 virus responsible for the  
35 COVID-19 pandemic, has highlighted the importance of non-pharmaceutical interventions (NPIs)  
36 in mitigating the impact of infectious diseases. NPIs encompass a wide range of public health  
37 measures, including social distancing, quarantine, mask-wearing, and school closures, all imple-  
38 mented with the primary goal of reducing disease transmission. The effectiveness of NPIs as a  
39 means to mitigate pandemics has been the subject of extensive research during the COVID-19  
40 pandemic.<sup>1-3</sup> Insights from these studies are crucial in guiding evidence-based public health  
41 responses to future pandemics. Various methods and models have been devised to assess NPI  
42 impact on disease transmission, ranging from straightforward descriptive techniques<sup>4,5</sup> and  
43 regression models<sup>6,7</sup> to advanced dynamic models<sup>8,9</sup> and machine learning approaches.<sup>10,11</sup>  
44 While this diversity of approaches contributes to the robustness of the estimates, it can intro-  
45 duce bias in systematic reviews and meta-analyses if a significant proportion of the methods  
46 are potentially unreliable. For example, different estimates of lockdown effectiveness have been  
47 found during the first wave in the United States, ranging from no reduction in case growth rates  
48 to a reduction by > 50%,<sup>10,12-14</sup> which can at least partially be attributed to different method-  
49 ologies being used.

50 One systematic review reported that the most frequently used methodologies are descriptions  
51 of change over time (48% of reviewed studies), non-mechanistic models such as regression  
52 models (27%), and mechanistic models (15%).<sup>15</sup> Among the latter two, many approaches involve  
53 the estimation of intermediary outcomes, primarily the effective reproductive number  $\mathcal{R}_t$ , from  
54 raw epidemiological data. These intermediary outcomes are then typically used in regression  
55 analyses to derive an estimate of NPI effectiveness. This strategy, which we call "two-step  
56 regression approach," has been used across a range of studies.<sup>16-20</sup> Dividing the estimation  
57 process into two steps has the advantage of reducing model complexity. However, in addition to  
58 the challenges of estimating  $\mathcal{R}_t$ , this approach fails to propagate the uncertainty associated with  
59  $\mathcal{R}_t$  estimation in the first step to the final estimates. Despite the frequent application of two-  
60 step models, the impact of chaining two analysis steps on confidence interval (CI) coverage and  
61 parameter bias has not been explored. Moreover, the performance of the one-step approach  
62 in estimating NPI effectiveness in mechanistic models remains an open area of investigation,  
63 both in terms of parameter bias and correct estimation of uncertainty.<sup>21</sup> Here, we describe an

64 extensive methodological study of the two approaches in the context of COVID-19 pandemic  
65 inspired by previous results on French data.<sup>8,19</sup>

## 66 2 Methods

### 67 2.1 Study design

68 Our primary objective was to construct a straightforward example for a meaningful compari-  
69 son of two methodological approaches. We generated epidemic data both with mechanistic  
70 Susceptible-Infected-Recovered (SIR)-type models and agent-based models (ABM) and then  
71 compared the performance of mechanistic models with two-step regression models on the  
72 simulated data. With each simulation method, we generated a total of 100 datasets, each com-  
73 prising 94 distinct geographical regions.<sup>8,19</sup> With both data generation models, we assumed  
74 entirely susceptible closed populations. The population sizes for each region were set to the  
75 respective population sizes of French departments (range 80k - 2.6 million, median 560k). We  
76 created scenarios comparable to the first months of an epidemic, with a first NPI, comparable in  
77 strength to a lockdown, followed by a second NPI, comparable to a post-lockdown intervention  
78 (Figures S4 and S2). Both NPIs were assumed to abruptly reduce transmission on a multiplica-  
79 tive scale, with an immediate and constant effect throughout their implementation.

80 **Data generation with a SIR model** We generated data with a SIR model, which consisted of  
81 a mathematical model using ordinary differential equations (ODEs) to describe the dynamics of  
82 SARS-CoV-2 transmission according to equation 1 and a linear mixed model that determined  
83 the transmission rate as a function of NPIs according to equation 2. To allow the basic transmis-  
84 sion rate to vary across regions, we included a random intercept.<sup>22</sup> No measurement error was  
85 added to the generated observations. We generated 100 datasets each under five conditions  
86 of depletion of susceptibles (2%, 10%, 20%, 40% and 60% depletion of susceptibles before  
87 implementation of NPI 1). For parameters used in each scenario, refer to Table S1. The true  
88  $\mathcal{R}_t$  was calculated as  $\frac{b_t S_t}{\gamma N}$ , where  $b$  represents the transmission rate,  $\gamma$  the recovery rate,  $S$  the  
89 number of susceptibles, and  $N$  the total population.

$$\begin{aligned}\dot{S} &= -\frac{bSI}{N} \\ \dot{I} &= \frac{bSI}{N} - \frac{I}{D_I} \\ \dot{R} &= \frac{I}{D_I}\end{aligned}\tag{1}$$

$$\begin{aligned}\log(b_i(t)) &= \log(b_0) + \beta_1 NPI_1(t) + \beta_2 NPI_2(t) + u_i^b \\ u_i^b &\sim N(0, \omega_b)\end{aligned}\tag{2}$$

90 **Data generation with a SEIRAHD model** To create more realistic scenarios, we generated  
91 data with a mechanistic SEIRAHD model, which has been used previously to estimate NPI  
92 and vaccine effectiveness.<sup>8,22</sup> Equation 2 was again used to model the transmission rate as a  
93 function of NPIs, and the mathematical model to describe the dynamics of SARS-CoV-2 trans-  
94 mission is presented in equation 3. The mathematical model comprised 7 compartments (Sus-  
95 ceptible, latently Exposed, symptomatically Infected, Asymptomatically infected, Hospitalized,  
96 Recovered, and Deceased), encompassing various stages of infection (see Figure S1). For a  
97 description of the data generation, see Supplementary Methods Section 1.2 and for model pa-  
98 rameters, see Table S2. To more closely represent real-life data, we added measurement error  
99 to the simulated observations (see Table S3). We kept the initial numbers of infected individuals  
100 low in order to have a very low depletion of susceptibles (<2% before implementation of NPI  
101 1).

$$\begin{aligned}\dot{S} &= -bS\frac{I + \alpha A}{N} \\ \dot{E} &= bS\frac{I + \alpha A}{N} - \frac{E}{D_E} \\ \dot{I} &= \frac{r_E E}{D_E} - \frac{r_H I}{D_Q} - \frac{(1 - r_H)I}{D_I} \\ \dot{A} &= \frac{(1 - r_E)E}{D_E} - \frac{A}{D_I} \\ \dot{H} &= \frac{r_H I}{D_Q} - \frac{(1 - fr)H}{D_H} - \frac{frH}{D_D} \\ \dot{R} &= \frac{(1 - fr)H}{D_H} + \frac{(1 - r_H)I + A}{D_I} \\ \dot{D} &= \frac{frH}{D_D}\end{aligned}\tag{3}$$

102 **Data generation with agent-based model** We generated data with an ABM under two differ-  
103 ent scenarios: in the random mixing scenario, every agent had an equal probability of coming  
104 into contact with any other agent in the population, with an equal probability of transmission for  
105 each contact. Conversely, in the multi-layer scenario, interactions were divided into layers of  
106 school, workplace, households, and community encounters, with varying transmission probabili-  
107 ties. In the multi-layer scenarios, we assumed that NPIs did not affect household transmission,  
108 and disease progression was age-specific. The population size mirrored French departments,  
109 and for the multi-layer scenarios, the age distribution and contact structure were set according  
110 to the French population. For both scenarios, epidemics were seeded by sampling the number  
111 of initially infected agents and the basic viral transmissibility per contact ( $vt$ ) from lognormal  
112 distributions (see table S2). Similar to the SEIRAHD models, we kept the depletion of suscep-  
113 tibles very low (2-3%) before the first NPI implementation.

## 114 2.2 Parameter estimation with mechanistic models

115 The SIR-generated data were analyzed with the corresponding SIR model. The SEIRAHD-  
116 generated data were analyzed both with the full SEIRAHD model and a reduced SEIR model  
117 (described in equation 4).

$$\begin{aligned}\dot{S} &= -\frac{bSI}{N} \\ \dot{E} &= \frac{bSI}{N} - \frac{E}{D_E} \\ \dot{I} &= \frac{E}{D_E} - \frac{I}{D_I} \\ \dot{R} &= \frac{I}{D_I}\end{aligned}\tag{4}$$

118 To increase comparability across geographical regions and therefore facilitate estimation, inci-  
119 dence data were scaled to 10,000 population. We fixed the progression parameters in the ODEs  
120 ( $D_I$ ,  $D_E$ , etc.) to their respective true values, while the transmission rate and initial condition  
121 of I compartment (SIR model) or E compartment (SEIR/SEIRAHD model) were estimated from  
122 the data with random effects, as well as the NPI parameters with fixed effects.

## 123 **2.3 Parameter estimation with two-step regression**

124 The approach for the  $\mathcal{R}_t$  regression was based on Paireau et al.<sup>19</sup> First, we estimated  $\mathcal{R}_t$  from  
125 incident infections or hospital admissions, separately for each simulated region, with a smooth-  
126 ing window of 7 days. In the SIR-generated datasets, we applied no smoothing because the  
127 data were generated without measurement error. The approach requires the input of a genera-  
128 tion interval. In the SIR model, the generation interval is equal to the  $D_I$  parameter, i.e. 5 days.  
129 For the data generated with the SEIRAHD model, case and hospitalization data (i.e. entries into  
130 the I and H compartments) were used as observations. For both, we calculated a generation  
131 interval with a mean of 10.1 days and a standard deviation of 8.75 days according to Wallinga  
132 et al.<sup>23</sup> (for details, see Supplementary Methods Section 1.3). In the ABMs, we only used symp-  
133 tom onset data for the analysis, and the distribution of the generation interval was calculated  
134 directly during simulation, with a mean of 8.45 and a standard deviation of 4.45 for random  
135 mixing models and 7.8 and 4.4 for multi-layer models. Second, we ran a mixed-effects regres-  
136 sion with the point estimate of the derived  $\log(\mathcal{R}_t)$  as outcome and the two NPIs as predictors.  
137 Using discretization, for region  $i = 1 \dots 94$  at weekly time points  $j = 1 \dots 17$ , we modeled:

$$\begin{aligned} \log(\mathcal{R}_i(t_{ij})) &= \log(\mathcal{R}_{0_{pop}}) + \beta_1 NPI_1(t_{ij}) + \beta_2 NPI_2(t_{ij}) + u_i^R + \epsilon_{ij} \\ u_i^R &\sim N(0, \omega_R) \\ \epsilon_{ij} &\sim N(0, \sigma) \end{aligned} \tag{5}$$

138 When using data generated with an incubation period (SEIRAHD models and ABMs), we lagged  
139 NPIs by 5 days for  $\mathcal{R}_t$  estimated from cases, and by 10 days for  $\mathcal{R}_t$  estimated from hospitaliza-  
140 tions, to account for transition periods. We performed sensitivity analyses with different lagging  
141 periods. We reported the 95% CI using the Normal Distribution, i.e. the mean plus or minus  
142 1.96 times the standard error.

143 To take into account the uncertainty from the  $\mathcal{R}_t$  estimation in the regression step, we also  
144 implemented a bootstrap procedure by repeatedly sampling from the  $\mathcal{R}_t$  distribution (details in  
145 Supplementary Methods Section 1.4).

## 146 **2.4 Performance evaluation**

147 For comparison of methods, we compared the absolute and relative bias, which we calculated as  
148  $|\hat{\beta} - \beta|$  and  $\frac{|\hat{\beta} - \beta|}{\beta}$ , respectively. Additionally, we assessed 95% CI coverage as the percentage

149 of datasets where the 95% CI contained the true value, separately for each estimated NPI  
150 parameter.

## 151 **2.5 Implementation**

152 We used the Simulx software version 2021 R2<sup>24</sup> to simulate the mechanistic model datasets.  
153 We used the Python package Covasim version 3.1.4<sup>25</sup> for ABM simulations, with "new infectious  
154 cases" as observations for further analysis. In the mechanistic model approach, parameters  
155 were estimated using maximum likelihood estimation using a stochastic approximation expect-  
156 tation maximization (SAEM) algorithm implemented in Monolix.<sup>24</sup> Standard errors for calculat-  
157 ing 95% CIs were derived from 100 bootstrap samples (by resampling on the 94 geographical  
158 regions and varying the algorithm starting point).

159 The two-step regression analysis was conducted in R version 4.2.3<sup>26</sup> with the packages EpiEs-  
160 tim<sup>27,28</sup> using recommendations from references<sup>29</sup> and<sup>30</sup> to estimate  $\mathcal{R}_t$  and lme4<sup>31</sup> for the  
161 mixed effects regression. All code is publicly available on GitHub (<https://github.com/sistm>).

## 162 **2.6 Bias exploration**

163 To detect possible issues in the regression step, we ran linear mixed models with the true  $\mathcal{R}_t$  as  
164 the outcome variable. In the SEIRAHD-created datasets, the true  $\mathcal{R}_t$  was calculated as a linear  
165 transformation of the transmission parameter, using the next generation matrix approach (see  
166 Supplementary Methods Section 1.5).<sup>32</sup> In the ABM datasets,  $\mathcal{R}_t$  was computed directly during  
167 the simulation as the quotient of new infections on day  $t$  over the number of infectious agents  
168 on the same day, multiplied by the average duration of infectiousness.<sup>25</sup>

169 To investigate the potential impact of NPI strength and implementation time on the two-step  
170 model performance, we simulated data with diverse NPI implementation times (ranging from a  
171 20-day to a 60-day NPI-free period) and varied NPI 1 strengths (coefficients ranging from -0.5  
172 to -2, corresponding to a percentage reduction in transmission between 39% and 86%).



## 173 3 Results

### 174 3.1 Exploring bias in the two-step regression models

175 **Data created with SIR model** First, we analyzed data generated with a simple SIR model,  
176 and different scenarios of depletion of susceptibles (ranging from 2% to 60%). We found that  
177 the bias in NPI effect estimations from the two-step regression model increased with greater  
178 depletion of susceptibles, whereas the mechanistic model consistently estimated the correct  
179 value (Table 1). For example, with a 2% depletion of susceptibles, the bias of the two-step  
180 regression model in estimating NPI 1 was 1%, which increased to 15% at 20% depletion of  
181 susceptibles and 45% at 60% depletion of susceptibles. Moreover, the 95% CI of the mech-  
182 anistic model covered the true value in all 100 simulated datasets. In contrast, the CIs from  
183 the two-step regression procedure were consistently too narrow, failing to cover the true value  
184 even in scenarios with little bias. The CI width was improved by bootstrapping the two-step  
185 regression procedure, but adequate coverage was only achieved in the scenario with the least  
186 bias. Of note, in the 40% and 60% depletion of susceptible scenarios, the 95% CIs for NPI  
187 2 showed good coverage despite a large bias. This anomaly can be attributed to the absence  
188 of viral transmission during the NPI 2 period, due to the high prior depletion of susceptibles  
189 (illustrated in Figure S5). Consequently, NPI 2 could only be estimated with high uncertainty,  
190 with 95% CIs ranging from -2.57 to -0.37, corresponding to a percentage reduction in trans-  
191 mission from 31% to 92%, making the CIs so wide that they are practically meaningless (Figure  
192 S6).

193 The influence of the depletion of susceptibles on the bias of estimates can be understood  
194 analytically. In the two-step regression procedure, NPI effects were estimated using the  $\mathcal{R}_t$   
195 estimated in the first step according to equation 5. With  $\mathcal{R}(t) = \frac{b(t)S(t)}{\gamma N}$  and replacing  $b$  by  
196 equation 2, we derive:

$$\log(\mathcal{R}_i(t_{ij})) = \log(b_0) - \log(\gamma N) + \log(S(t)) + \beta_1 NPI_1(t_{ij}) + \beta_2 NPI_2(t_{ij}) + u_i + \epsilon_{ij} \quad (6)$$

197 In this equation,  $\log(b_0)$  and  $\log(\gamma N)$  are constants and thus included in the intercept term. In  
198 contrast,  $\log(S(t))$  is time-varying and thus has the potential to bias the estimated NPI effects,  
199 with a greater depletion of susceptibles over the estimation period leading to an increased bias.

200

| Depletion of S       | 2%    |       | 10%  |       | 20%  |       | 40%  |       | 60%  |       |
|----------------------|-------|-------|------|-------|------|-------|------|-------|------|-------|
|                      | Reg.  | Mech. | Reg. | Mech. | Reg. | Mech. | Reg. | Mech. | Reg. | Mech. |
| <b>NPI 1</b>         |       |       |      |       |      |       |      |       |      |       |
| Absolute bias        | -0.02 | 0.00  | 0.10 | 0     | 0.21 | 0     | 0.40 | 0     | 0.65 | 0     |
| Relative bias (%)    | 1.2   | 0.2   | 7.0  | 0     | 14.8 | 0     | 27.4 | 0     | 45.0 | 0     |
| 95% CI (%)           | 0     | -     | 0    | -     | 0    | -     | 0    | -     | 0    | -     |
| 95% bootstrap CI (%) | 100   | 100   | 0    | 100   | 0    | 100   | 0    | 100   | 0    | 100   |
| <b>NPI 2</b>         |       |       |      |       |      |       |      |       |      |       |
| Absolute bias        | 0.05  | 0     | 0.20 | 0     | 0.33 | 0     | 0.42 | 0     | 0.48 | 0     |
| Relative bias (%)    | 6.6   | 0.1   | 24.5 | 0     | 40.9 | 0     | 51.9 | 0     | 59.5 | 0     |
| 95% CI (%)           | 0     | -     | 0    | -     | 0    | -     | 0    | -     | 0    | -     |
| 95% bootstrap CI (%) | 100   | 100   | 0    | 100   | 0    | 100   | 100  | 100   | 100  | 100   |

Table 1: Evaluation metrics from SIR simulation. For each scenario of depletion of susceptibles, the mean absolute and relative bias and percentage of CIs covering the true value across 100 simulated datasets are shown. The columns indicate the analysis model. The CI rows show the percentage of datasets where the 95% CI covers the true value. The 95% CI of the mechanistic model was always determined with bootstrap.

Reg. two-step regression model, Mech. mechanistic model, CI confidence interval, NPI non-pharmaceutical intervention

201 **Data created with SEIRAHD model** While the SIR scenarios are useful to understand the  
 202 general underlying challenges of the two-step regression procedure, the SIR model's simplicity  
 203 does not capture the complexity of real-world scenarios. The data generated by the SEIRAHD  
 204 model address this limitation by offering a more realistic representation of an epidemic. The  
 205 point estimates from the two-step regression models displayed substantial bias, particularly  
 206 pronounced for the first NPI (relative bias ranging from 18-25%) compared to the second NPI  
 207 (approximately 14-18%, see Table 2). Throughout all datasets, using hospitalizations for  $\mathcal{R}_t$   
 208 estimation and subsequent regression consistently resulted in higher bias compared to using  
 209 case data. Moreover, the CIs derived from these models consistently failed to include the true  
 210 NPI values. When the two-step regression procedure was bootstrapped, the CIs were wider and  
 211 included the true value for NPI 2, but not for NPI 1.

212 In contrast, the 95% CIs for both NPIs derived with the mechanistic models covered the true  
 213 value in all 100 datasets, while the point estimates exhibited only minimal absolute and relative  
 214 bias (<1% for both NPIs, detailed in Table 2). The exceptional accuracy of the SEIRAHD model  
 215 was anticipated, as it was the model used for data generation.

### 216 3.2 Origins of bias

217 In light of the substantial bias observed in the two-step regression model when a more realistic  
 218 model was used for data generation, we investigated in depth the origins of this issue. Firstly,  
 219 we examined the regression analysis step by running the linear mixed-effects model with the

| Metric               | SEIR model | SEIRAHD model | Regression model cases | Regression model hosp. |
|----------------------|------------|---------------|------------------------|------------------------|
| <b>NPI 1</b>         |            |               |                        |                        |
| Absolute bias        | 0.00       | 0.01          | -0.26                  | -0.37                  |
| Relative bias (%)    | 0.3        | 0.4           | 18.3                   | 25.4                   |
| 95% CI (%)           | -          | -             | 0                      | 0                      |
| 95% bootstrap CI (%) | 100        | 100           | 0                      | 0                      |
| <b>NPI 2</b>         |            |               |                        |                        |
| Absolute bias        | 0.01       | 0.00          | -0.11                  | -0.15                  |
| Relative bias (%)    | 0.8        | 0.7           | 13.7                   | 18.5                   |
| 95% CI (%)           | -          | -             | 0                      | 0                      |
| 95% bootstrap CI (%) | 100        | 100           | 99                     | 100                    |

Table 2: Evaluation metrics over 100 datasets created with the mechanistic SEIRAHD model. The columns indicate the analysis model. The CI rows show the percentage of datasets where the 95% CI covers the true value. The 95% CI of the mechanistic model was always determined with bootstrap.

CI confidence interval, hosp. hospitalization, NPI non-pharmaceutical intervention

220 true  $\mathcal{R}_t$  values as the outcome variable. While the regression model fitted the true  $\mathcal{R}_t$  almost  
 221 perfectly and estimated NPI effects with only slight bias for data generated by the SEIRAHD  
 222 model (Table S4 and Figure 1A), the CIs failed to cover the true values due to the estimation of  
 223 extremely small standard errors. However, based on these findings, we ruled out the regression  
 224 step as the primary contributor to the bias.

225 Comparing the  $\mathcal{R}_t$  curves estimated in the two-step procedure to the true  $\mathcal{R}_t$  from the mech-  
 226 anistic SEIRAHD model, we identified discrepancies at the onset of the epidemic and a lag in  
 227  $\mathcal{R}_t$  estimation by EpiEstim when the true  $\mathcal{R}_t$  underwent sudden changes resulting from the im-  
 228 plementation or lifting of NPIs (Figure 1B). These lags led to an underestimation of the strength  
 229 of NPI 1 and overestimation of NPI 2, as the regression model estimated an average of the  
 230 NPI periods. The pronounced decline in the first days contributed to the regression model  
 231 consistently overestimating  $\mathcal{R}_0$ , i.e.  $\mathcal{R}_t$  at the onset of the epidemic.

232 We proceeded to investigate whether NPI strength had any discernible impact on the bias in  
 233  $\mathcal{R}_t$  estimation. For NPI 1, we observed that both absolute and relative bias increased with the  
 234 rise in NPI strength. Regarding NPI 2, the bias followed a U-shaped pattern with increasing  
 235 NPI 1 strength, with an underestimation of  $\mathcal{R}_t$  during the NPI 2 period by all models (Figures S8  
 236 and S9). A more gradual NPI implementation period, involving a linear increase and decrease  
 237 of NPIs from 0 to 1 over 1 or 2 weeks, did not improve  $\mathcal{R}_t$  estimation nor the bias in regression  
 238 coefficients (Figure S10 and Table S5).

239 Since the SIR model produced accurate results in the scenarios with low depletion of suscepti-

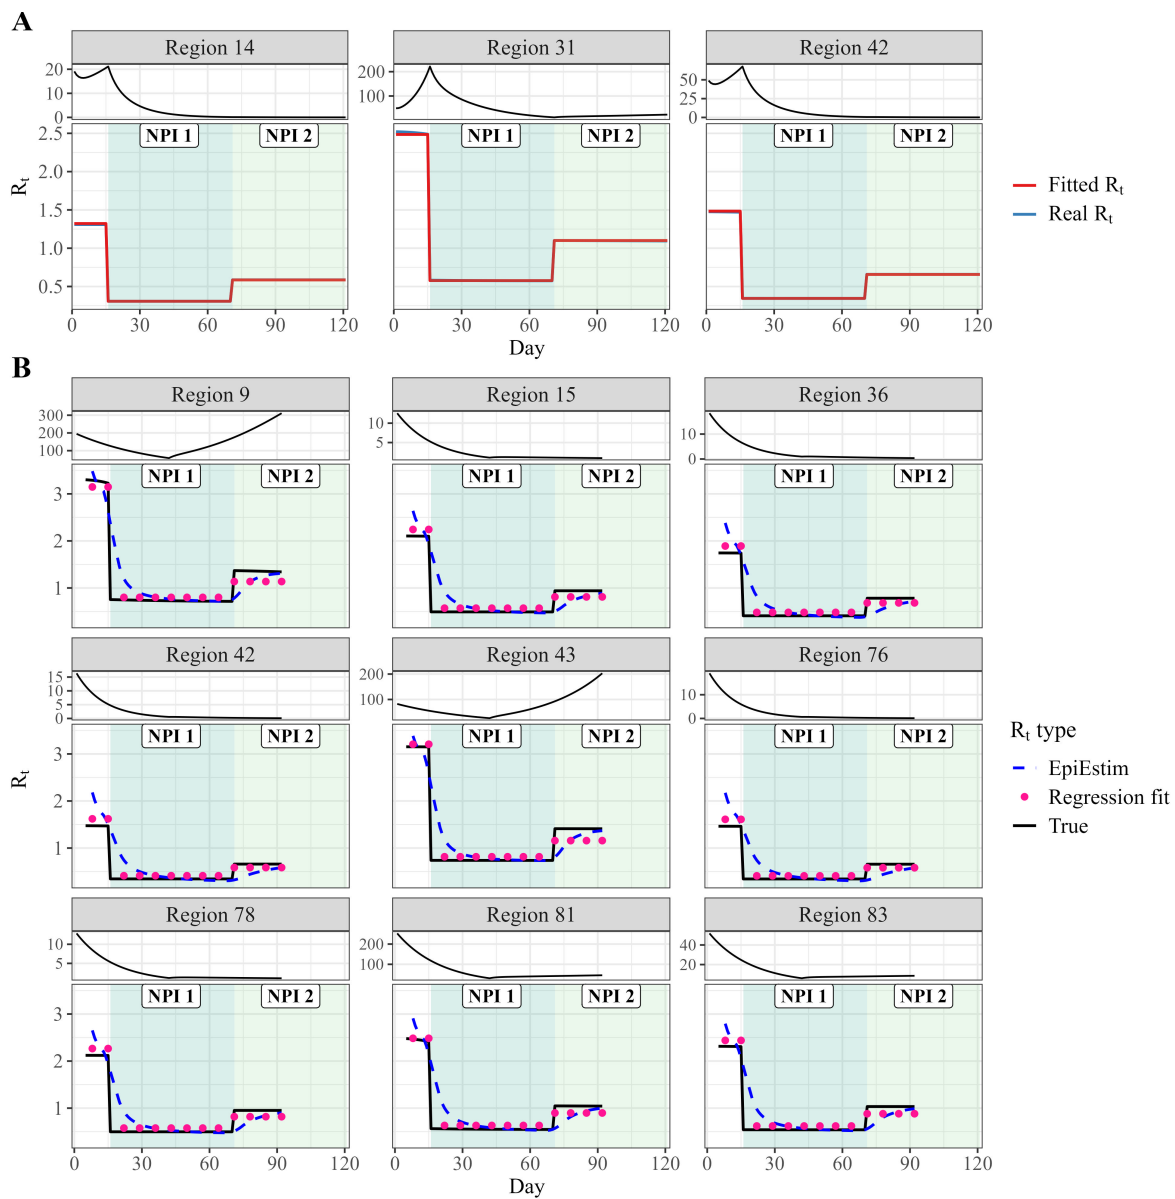

Figure 1: 2-step regression bias exploration. **A:** Regression fits of true  $\mathcal{R}_t$  in three randomly selected regions. Each panel represents one geographic region with data generated by the mechanistic SEIRAH model. The true  $\mathcal{R}_t$  is depicted in blue and the corresponding regression fit in red. The panels on top show the respective case time series.

**B:**  $\mathcal{R}_t$  fits by the two-step procedure and subsequent regression for data generated by the mechanistic SEIRAH model. Each panel represents one geographic region. The highlighted regions indicate which NPI was active at which time. The top panels the respective case time series. Note that we followed EpiEstim guidelines in terms of not estimating  $\mathcal{R}_t$  before 2 generation times after the start of the epidemic, but these 2 weeks are cut off from the plot.

240 bles, we hypothesized that a potential source of error in the two-step procedure could stem from  
241 the convolution of the time series. For an optimal  $\mathcal{R}_t$  estimation, the most pertinent data are  
242 the dates of infection, aligning with the entry into the E compartment in our model, thereby cap-  
243 turing real-time transmission dynamics. Estimating  $\mathcal{R}_t$  based on newly infected (corresponding  
244 to entry into the E compartment) instead of newly symptomatic (entry into I compartment) re-  
245 sulted in a notable reduction in relative bias for NPI 1, diminishing to 4.5%. However, the bias  
246 in NPI 2 estimation increased to 22.9% (see Table S6).

### 247 **3.3 Limitations of the mechanistic approach in the context of misspecified** 248 **models**

249 To assess the robustness of the mechanistic model approach in the face of model misspecifi-  
250 cation, we generated data with ABMs, which include more heterogeneous individual behavior  
251 and population interactions, and a different underlying disease progression than assumed in  
252 the SEIRAHD model. We observed that even within the ABM framework, the mechanistic SEIR  
253 model in general demonstrated superior performance in terms of bias and coverage compared  
254 to the two-step regression model. The SEIR model effectively estimated NPI 1 with minimal  
255 bias around 2% and 95% CIs covered the true value in more than 95% of datasets, regard-  
256 less of whether the data were generated using random mixing or the multi-layer ABM (Table 3).  
257 However, for NPI 2, CI estimated by the SEIR model covered the true value in only 71% of the  
258 random mixing datasets but 100% of the multi-layer datasets. For NPI 1, the CIs derived from  
259 the regression model (both bootstrapped and non-bootstrapped) systematically failed to cover  
260 the values and displayed significant underestimation (relative bias of 12% for random mixing  
261 and 19% for multi-layer). However, the bias for NPI 2 was substantially lower (5% for random  
262 mixing and 1% for multi-layer).

## 263 **4 Discussion**

264 We evaluated and contrasted the performance of mechanistic models with two-step  $\mathcal{R}_t$  estima-  
265 tion and subsequent regression modelling for estimating the relative reduction in viral transmis-  
266 sion caused by NPIs. Mechanistic models consistently outperformed the two-step procedure  
267 both in terms of bias and coverage. The two-step procedure consistently underestimated stan-  
268 dard errors of the parameter estimates across all analyses. This issue stems from the failure to

|                      | SEIR random mixing | SEIR multi-layer | Reg model random mixing | Reg model multi-layer |
|----------------------|--------------------|------------------|-------------------------|-----------------------|
| <b>NPI 1</b>         |                    |                  |                         |                       |
| Absolute bias        | 0.04               | -0.02            | -0.18                   | -0.27                 |
| Relative bias (%)    | 2.6                | 1.3              | 12.2                    | 18.7                  |
| 95% CI (%)           | -                  | -                | 0                       | 0                     |
| 95% bootstrap CI (%) | 100                | 100              | 0                       | 0                     |
| <b>NPI 2</b>         |                    |                  |                         |                       |
| Absolute bias        | -0.04              | 0.02             | -0.05                   | -0.01                 |
| Relative bias (%)    | 4.7                | 3.2              | 5.7                     | 1.5                   |
| 95% CI (%)           | -                  | -                | 0                       | 91                    |
| 95% bootstrap CI (%) | 71                 | 100              | 0                       | 95                    |

Table 3: Evaluation metrics for 100 datasets created with the agent-based model. The CI rows show the percentage of datasets where the 95% CI covers the true value. The 95% CI of the mechanistic model was always determined with bootstrap.

ABM agent-based model, CI confidence interval, NPI non-pharmaceutical intervention, reg regression

269 propagate the error in  $\mathcal{R}_t$  estimation into the final estimate, compounded by the overconfidence  
 270 of the regression procedure, as observed in regressions with known  $\mathcal{R}_t$  as the outcome vari-  
 271 able. We showed that this issue could be improved by repeatedly sampling from the posterior  
 272 distribution of the  $\mathcal{R}_t$  estimated in the two-step procedure.

273 Similar to Gostic et al.,<sup>30</sup> we found that in a basic SIR scenario without weekly smoothing of  
 274 observations and low depletion of susceptibles,  $\mathcal{R}_t$  was estimated accurately, leading to nearly  
 275 unbiased NPI effectiveness parameters. This result suggests that the parameter bias observed  
 276 in the two-step regression model was not uniform across scenarios. However, in scenarios with  
 277 higher depletion of susceptibles, the bias increased substantially. As an epidemic progresses,  
 278 the number of susceptibles diminishes, resulting in a reduction of  $\mathcal{R}_t$ . While not problematic for  
 279  $\mathcal{R}_t$  estimation itself, the regression procedure will attribute the decrease in  $\mathcal{R}_t$  to the NPI, thus  
 280 making them appear more effective than they truly are, with the bias increasing as the depletion  
 281 of susceptibles increases.

282 In the more realistic scenarios, such as those generated by the SEIRAHD and ABM models as  
 283 compared to the scenarios generated by SIR models, we observed greater bias in the point es-  
 284 timates produced by the two-step regression procedure, particularly for the first NPI. This bias  
 285 can be attributed to several factors. First, the representation of the natural history of infection in  
 286 the SEIRAHD model and ABM differs from that assumed by EpiEstim. If we had generated data  
 287 with a mechanism more consistent with EpiEstim, i.e., with the generation time distribution as  
 288 an input parameter, estimation with the SEIRAHD model would likely have resulted in bias for  
 289 the mechanistic models. This is because misspecification of the generation time distribution

290 can bias estimates of the reproduction number, regardless of the approach used.<sup>23</sup> However, it  
291 remains debatable which approach is more realistic: simulating with the generation time as an  
292 input parameter or simulating with an underlying compartmental structure.

293 Second, the inability to replicate the sharp decline induced by NPI implementation can be at-  
294 tributed to the long smoothing time window (7 days) coupled with a lengthy generation interval  
295 (10.1 days in SEIRAH models). This gradual convergence of the estimated to the true  $\mathcal{R}_t$  fol-  
296 lowing NPI implementation, led to inaccurate estimations of NPI impact, as regression models  
297 fit an average across the entire NPI period. However, we found that gradually implementing  
298 NPIs did not reduce the bias in regression estimates. Moreover, smoothing is necessary to  
299 manage measurements errors and other irregularities in the observational data.

300 Third, the lag in observational time series behind real-time transmission might contribute to the  
301 bias, as symptomatic infections or hospitalizations capture transmission events that occurred  
302 in the past. This delay cannot be rectified by merely lagging the NPIs, and could explain why  
303 estimates from hospitalizations were less accurate than estimations from cases, as we only  
304 shifted NPI periods without considering the deconvolution of the time series.<sup>30</sup> Indeed, using  
305 transmission-related observations directly (entry into the E compartment) helped reduce this  
306 bias. Several R packages for back-calculating transmission events from cases or hospitaliza-  
307 tions are now available, such as EpiNow2 and EstimateR.<sup>33,34</sup>

308 Using regression analyses without accounting for the depletion of susceptibles also precludes  
309 strong causal conclusions about the effect of NPIs. Mechanistic models, which explicitly con-  
310 sider viral transmission mechanisms and therefore depletion of susceptibles, offer an alternative  
311 for causal interpretation,<sup>21</sup> but require detailed data and time to develop and estimate models.  
312 Running 100 bootstrap repetitions on 100 SIR datasets parallelized on 20 high-performance  
313 computing nodes took approximately 42 hours. Since the two methodologies were run on dif-  
314 ferent computing platforms, their computing times are hard to compare. Nevertheless, the  
315 two-step regression procedure, parallelized on 16 conventional laptop cores, required only four  
316 hours of computing time. In an early epidemic or pandemic setting, timely results are of great  
317 importance, so this trade-off between speed and accuracy of the results needs to be taken  
318 into account when deciding on a model. Therefore, developing user-friendly software for rapid  
319 epidemiological modeling in such scenarios is essential.

320 Our study comes with limitations that need to be acknowledged. First, it is important to note that



321 our simulations do not prove that the mechanistic approach will always be unbiased. Indeed,  
322 in estimating parameters in datasets created by ABMs, we observed a reduced CI coverage  
323 with mechanistic models. Second, our simulated datasets did not consider various system-  
324 atic biases, such as reporting delays, significant under-reporting or missing observations. The  
325 only measurement error present was random noise on observations, and we did not incorporate  
326 weekly trends or seasonal changes in transmission. Moreover, we simulated only two consec-  
327 utive NPIs with no overlap. Our most realistic scenarios were therefore simpler than real-life  
328 scenarios during the COVID-19 pandemic, with spatial structures, multiple overlapping NPIs  
329 implemented to varying degrees, behavioural dynamics, and more. It is likely that in a real-  
330 life scenario, the problem could be even more exacerbated because of practical identifiability  
331 issues. However, our primary objective was to illustrate and compare the performance of two  
332 analysis methods under close-to-optimal conditions, and these limitations do not threaten the  
333 validity of our results. To address some of these simplifications, we included simulations us-  
334 ing ABM. However, we acknowledge that when analyzing real-world data, misspecification of  
335 the mechanistic model (for example, assumptions about the natural history of infection) might  
336 equally lead to bias. This is particularly true in the context of real-time modelling of emerging  
337 pathogens.

338 Improving the public health response during an epidemic depends on informed decision-making  
339 about NPIs. Our findings have significant implications for refining the methodology used to  
340 estimate the effectiveness of NPIs. Our findings highlight the potential for a systematic un-  
341 derestimation of uncertainty in the two-step regression procedure, raising concerns about the  
342 reliability of its effectiveness estimates across different scenarios. While compartmental mod-  
343 els demonstrate superior performance over simpler models, their resource requirements, as  
344 they also require more time and expertise to implement, must be weighed against their bene-  
345 fits.

## 346 **5 Contributions**

347 Conceptualization: MP, RT, IG, SC and supervision: MP, DLB, and RT. Formal analysis, writing -  
348 original draft: IG. Methodology and writing - review & editing: all.



## 349 **6 Declaration of interests**

350 The authors declare no competing interests.

## 351 **7 Data sharing**

352 All code is available at the SISTM team's GitHub ([https://github.com/sistm/SEIR\\_vs\\_RTreg](https://github.com/sistm/SEIR_vs_RTreg)).

## 353 **8 Acknowledgements**

354 IG is supported by the Digital Public Health Graduate Program within the framework of the  
355 PIA3 (Investment for the Future), project reference: 17-EURE-0019, and by a doctoral award  
356 from the Fonds de recherche du Québec-Santé. This work has been pursued in the EMER-  
357 GEN project framework of the French Agency for Research on AIDS and Emerging Infectious  
358 Diseases (ANRS0151) and supported by INSERM and the Investissements d'Avenir program,  
359 Vaccine Research Institute (VRI), managed by the ANR under reference ANR-10-LABX-77-01.  
360 We thank Lixoft SAS for their support. Numerical computations were in part carried out using  
361 the PlaFRIM experimental testbed, supported by Inria, CNRS (LABRI and IMB), Université de  
362 Bordeaux, Bordeaux INP, and Conseil Régional d'Aquitaine (see <https://www.plafrim.fr>).
